# Supplementary material
Source: PubMed Central journal article supplement (PMC3378856)

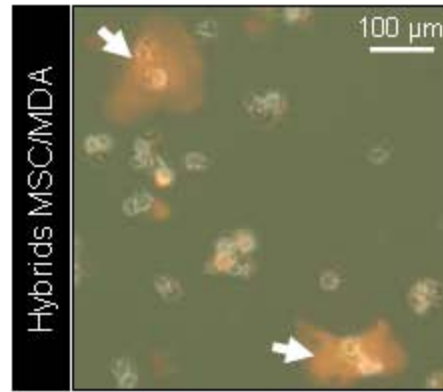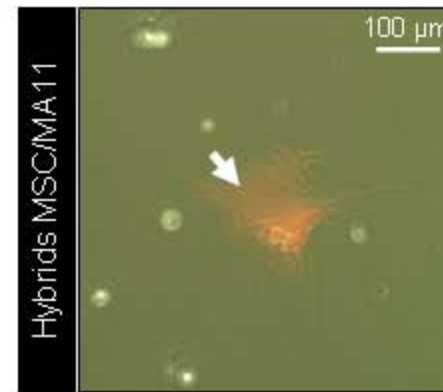

Figure S1

Supplement: mmc1.pdf [file mmc1.pdf]

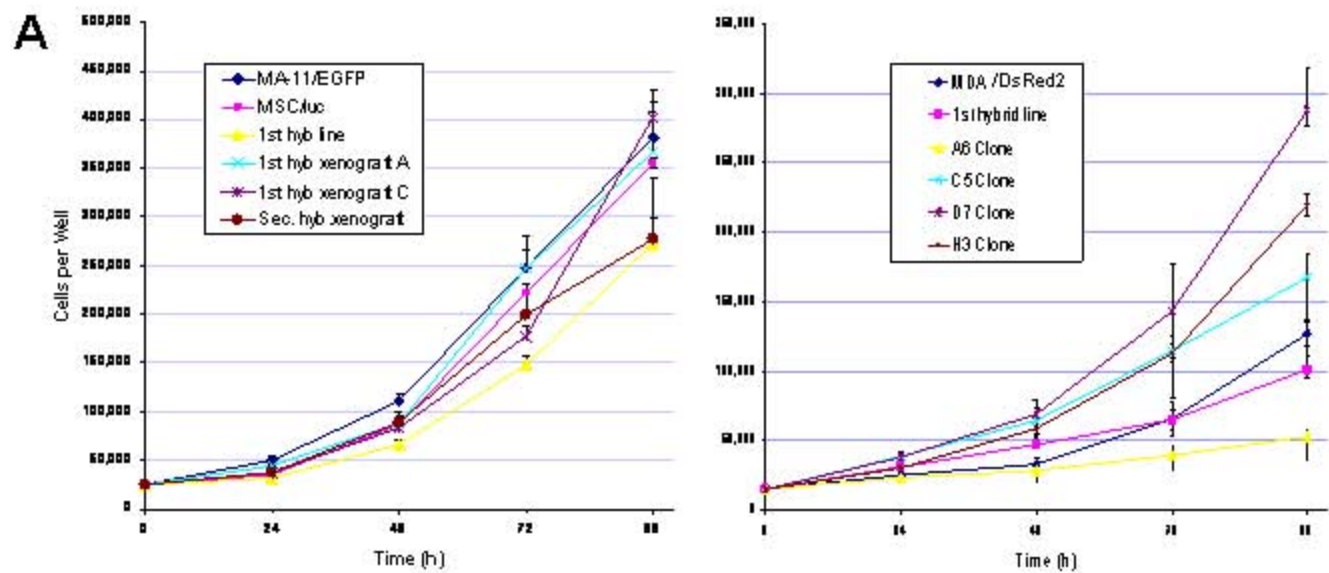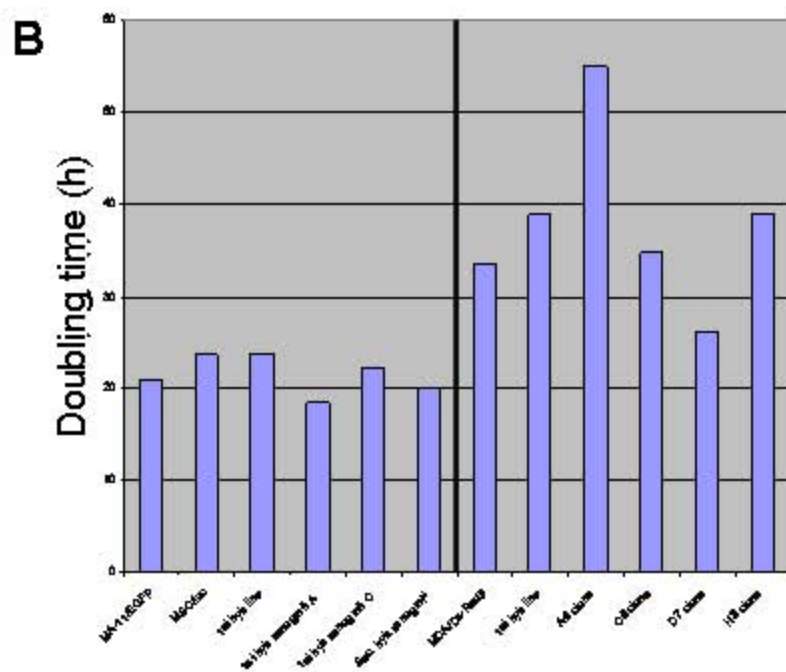

Figure S2

Supplement: mmc2.pdf [file mmc2.pdf]
